# Supplementary material for: Optimization of the dilute maleic acid pretreatment of wheat straw
Source: Springer Nature journal article supplement (doi:10.1186/1754-6834-2-31), 2009-01-01
Supplement: Additional file 1 [file 1754-6834-2-31-s1.pdf]

Glucose benefits

| Factor     | Coefficient Estimate | df | Standard Error | 95% CI Low | 95% CI High |
|------------|----------------------|----|----------------|------------|-------------|
| Intercept  | 53.1117              | 1  | 1.115815       | 50.70113   | 55.52227    |
| Block 1    | 0.745003             | 2  |                |            |             |
| Block 2    | -0.429903            |    |                |            |             |
| Block 3    | -0.315099            |    |                |            |             |
| A-Pre time | 4.028366             | 1  | 1.028159       | 1.807163   | 6.249569    |
| B-Pre Tem  | 12.00357             | 1  | 1.028159       | 9.782372   | 14.22478    |
| C-Maleic a | 10.35827             | 1  | 1.028159       | 8.137071   | 12.57948    |
| C^2        | -9.830231            | 1  | 1.592817       | -13.2713   | -6.389159   |

ANOVA for Response Surface Reduced Quadratic Model

| Analysis of variance table [Partial sum of squares - Type III] |                |    |             |          |                      |
|----------------------------------------------------------------|----------------|----|-------------|----------|----------------------|
| Source                                                         | Sum of Squares | df | Mean Square | F Value  | p-value Prob > F     |
| Block                                                          | 67.156386      | 2  | 33.57819    |          |                      |
| Model                                                          | 3078.7129      | 4  | 769.6782    | 72.80959 | < 0.0001 significant |
| A-Pre tin                                                      | 162.27732      | 1  | 162.2773    | 15.35102 | 0.0018               |
| B-Pre Te                                                       | 1440.858       | 1  | 1440.858    | 136.3015 | < 0.0001             |
| C-Maleic                                                       | 1072.9383      | 1  | 1072.938    | 101.4972 | < 0.0001             |
| C^2                                                            | 402.63934      | 1  | 402.6393    | 38.08865 | < 0.0001             |
| Residual                                                       | 137.42445      | 13 | 10.57111    |          |                      |
| Lack of Fit                                                    | 136.02462      | 10 | 13.60246    | 29.15179 | 0.0091 significant   |
| Pure Error                                                     | 1.3998245      | 3  | 0.466608    |          |                      |
| Cor Total                                                      | 3283.2938      | 19 |             |          |                      |

0.957 R<sup>2</sup>  
0.944 R<sup>2</sup> adj

Xylose benefits

| Factor     | Coefficient Estimate | df | Standard Error | 95% CI Low | 95% CI High |
|------------|----------------------|----|----------------|------------|-------------|
| Intercept  | 14.31705             | 1  | 0.601537       | 13.02688   | 15.60722    |
| Block 1    | 0.964818             | 2  |                |            |             |
| Block 2    | -0.522899            |    |                |            |             |
| Block 3    | -0.441919            |    |                |            |             |
| B-Pre Tem  | 2.974675             | 1  | 0.554282       | 1.785857   | 4.163492    |
| C-Maleic a | 5.132318             | 1  | 0.554282       | 3.943501   | 6.321135    |
| C^2        | -5.245643            | 1  | 0.85869        | -7.08735   | -3.403935   |

ANOVA for Response Surface Reduced Quadratic Model

| Analysis of variance table [Partial sum of squares - Type III] |                |    |             |          |                      |
|----------------------------------------------------------------|----------------|----|-------------|----------|----------------------|
| Source                                                         | Sum of Squares | df | Mean Square | F Value  | p-value Prob > F     |
| Block                                                          | 17.770819      | 2  | 8.885409    |          |                      |
| Model                                                          | 466.54698      | 3  | 155.5157    | 50.61883 | < 0.0001 significant |
| B-Pre Te                                                       | 88.486896      | 1  | 88.4869     | 28.80162 | < 0.0001             |
| C-Maleic                                                       | 263.40689      | 1  | 263.4069    | 85.73637 | < 0.0001             |
| C^2                                                            | 114.6532       | 1  | 114.6532    | 37.3185  | < 0.0001             |
| Residual                                                       | 43.012042      | 14 | 3.072289    |          |                      |
| Lack of Fit                                                    | 42.956074      | 11 | 3.905098    | 209.3223 | 0.0005 significant   |
| Pure Error                                                     | 0.0559677      | 3  | 0.018656    |          |                      |
| Cor Total                                                      | 527.32984      | 19 |             |          |                      |

0.916 R<sup>2</sup>  
0.898 R<sup>2</sup> adj

(Acid costs)^0.5

| Factor     | Coefficient Estimate | df | Standard Error | 95% CI Low | 95% CI High |
|------------|----------------------|----|----------------|------------|-------------|
| Intercept  | 2.872143             | 1  | 0.034905       | 2.793184   | 2.951103    |
| Block 1    | -0.163568            | 2  |                |            |             |
| Block 2    | 0.247284             |    |                |            |             |
| Block 3    | -0.083716            |    |                |            |             |
| A-Pre time | 0.227573             | 1  | 0.029618       | 0.160574   | 0.294573    |
| B-Pre Tem  | 0.560977             | 1  | 0.029618       | 0.493977   | 0.627977    |
| C-Maleic a | 1.575389             | 1  | 0.029618       | 1.508389   | 1.642389    |
| AB         | 0.245813             | 1  | 0.033113       | 0.170905   | 0.32072     |
| AC         | 0.119687             | 1  | 0.033113       | 0.044779   | 0.194595    |
| BC         | 0.382614             | 1  | 0.033113       | 0.307706   | 0.457522    |
| B^2        | 0.370056             | 1  | 0.053717       | 0.248539   | 0.491573    |
| C^2        | -0.448037            | 1  | 0.053717       | -0.569554  | -0.32652    |

ANOVA for Response Surface Reduced Quadratic Model

| Analysis of variance table [Partial sum of squares - Type III] |                |       |             |          |                        |
|----------------------------------------------------------------|----------------|-------|-------------|----------|------------------------|
| Source                                                         | Sum of Squares | df    | Mean Square | F Value  | p-value Prob > F       |
| Block                                                          | 0.548          | 2.000 | 0.273993    |          |                        |
| Model                                                          | 30.941         | 8.000 | 3.867628    | 440.905  | < 0.0001 significant   |
| A-Pre tim                                                      | 0.518          | 1.000 | 0.517896    | 59.03949 | < 0.0001               |
| B-Pre Temper                                                   | 3.147          | 1.000 | 3.146953    | 358.7489 | < 0.0001               |
| C-Maleic acid                                                  | 24.819         | 1.000 | 24.8185     | 2829.28  | < 0.0001               |
| AB                                                             | 0.483          | 1.000 | 0.483391    | 55.10597 | < 0.0001               |
| AC                                                             | 0.115          | 1.000 | 0.1146      | 13.06429 | 0.0056                 |
| BC                                                             | 1.171          | 1.000 | 1.171148    | 133.5095 | < 0.0001               |
| B^2                                                            | 0.416          | 1.000 | 0.416302    | 47.4579  | < 0.0001               |
| C^2                                                            | 0.610          | 1.000 | 0.610241    | 69.56676 | < 0.0001               |
| Residual                                                       | 0.079          | 9.000 | 0.008772    |          |                        |
| Lack of Fit                                                    | 0.0636075      | 6     | 0.010601    | 2.07317  | 0.2934 not significant |
| Pure Error                                                     | 0.0153406      | 3     | 0.005114    |          |                        |
| Cor Total                                                      | 31.567956      | 19    |             |          |                        |

0.997 R<sup>2</sup>  
0.995 R<sup>2</sup> adj

NaOH costs

| Factor        | Coefficient Estimate | df | Standard Error | 95% CI Low | 95% CI High |
|---------------|----------------------|----|----------------|------------|-------------|
| Intercept     | 0.982634             | 1  | 0.020664       | 0.938828   | 1.02644     |
| Block 1       | 0.009952             | 2  |                |            |             |
| Block 2       | 0.002787             |    |                |            |             |
| Block 3       | -0.012739            |    |                |            |             |
| C-Maleic acid | 0.825155             | 1  | 0.028957       | 0.763769   | 0.886541    |

ANOVA for Response Surface Reduced Linear Model

| Analysis of variance table [Partial sum of squares - Type III] |                |    |             |          |                        |
|----------------------------------------------------------------|----------------|----|-------------|----------|------------------------|
| Source                                                         | Sum of Squares | df | Mean Square | F Value  | p-value Prob > F       |
| Block                                                          | 0.0019066      | 2  | 0.000953    |          |                        |
| Model                                                          | 6.8088067      | 1  | 6.808807    | 812.025  | < 0.0001 significant   |
| C-Maleic acid                                                  | 6.8088067      | 1  | 6.808807    | 812.025  | < 0.0001               |
| Residual                                                       | 0.1341596      | 16 | 0.008385    |          |                        |
| Lack of Fit                                                    | 0.1207683      | 13 | 0.00929     | 2.081176 | 0.2986 not significant |
| Pure Error                                                     | 0.0133913      | 3  | 0.004464    |          |                        |
| Cor Total                                                      | 6.9448729      | 19 |             |          |                        |

0.981 R<sup>2</sup>  
0.979 R<sup>2</sup> adj

Log10(Furfural concentration)

| Factor         | Coefficient Estimate | df | Standard Error | 95% CI Low | 95% CI High |
|----------------|----------------------|----|----------------|------------|-------------|
| Intercept      | -0.421494            | 1  | 0.046107       | -0.521953  | -0.321035   |
| Block 1        | 0.042894             | 2  |                |            |             |
| Block 2        | -0.009522            |    |                |            |             |
| Block 3        | -0.033372            |    |                |            |             |
| A-Pre time     | 0.213288             | 1  | 0.042485       | 0.12072    | 0.305855    |
| B-Pre Tem      | 0.566968             | 1  | 0.042485       | 0.474401   | 0.659536    |
| C-Maleic acid  | 0.328423             | 1  | 0.042485       | 0.235856   | 0.42099     |
| BC             | 0.166457             | 1  | 0.0475         | 0.062964   | 0.26995     |
| C <sup>2</sup> | -0.22436             | 1  | 0.065818       | -0.367764  | -0.080955   |

ANOVA for Response Surface Reduced Quadratic Model

| Analysis of variance table [Partial sum of squares - Type III] |                |    |             |          |                      |
|----------------------------------------------------------------|----------------|----|-------------|----------|----------------------|
| Source                                                         | Sum of Squares | df | Mean Square | F Value  | p-value Prob > F     |
| Block                                                          | 0.0172938      | 2  | 0.008647    |          |                      |
| Model                                                          | 5.1794656      | 5  | 1.035893    | 57.39058 | < 0.0001 significant |
| A-Pre time                                                     | 0.4549159      | 1  | 0.454916    | 25.20326 | 0.0003               |
| B-Pre Tem                                                      | 3.214532       | 1  | 3.214532    | 178.0916 | < 0.0001             |
| C-Maleic acid                                                  | 1.0786159      | 1  | 1.078616    | 59.75751 | < 0.0001             |
| BC                                                             | 0.2216629      | 1  | 0.221663    | 12.28057 | 0.0043               |
| C <sup>2</sup>                                                 | 0.2097389      | 1  | 0.209739    | 11.61996 | 0.0052               |
| Residual                                                       | 0.2165986      | 12 | 0.01805     |          |                      |
| Lack of Fit                                                    | 0.2157627      | 9  | 0.023974    | 86.04659 | 0.0018 significant   |
| Pure Error                                                     | 0.0008358      | 3  | 0.000279    |          |                      |
| Cor Total                                                      | 5.413358       | 19 |             |          |                      |

0.960 R<sup>2</sup>  
0.943 R<sup>2</sup> adj

Heating costs

| Factor    | Coefficient Estimate | df | Standard Error | 95% CI Low | 95% CI High |
|-----------|----------------------|----|----------------|------------|-------------|
| Intercept | 1.784617             | 1  | 3.48E-07       | 1.784616   | 1.784617    |
| Block 1   | -2.74E-07            | 2  |                |            |             |
| Block 2   | 7.83E-07             |    |                |            |             |
| Block 3   | -5.09E-07            |    |                |            |             |
| B-Pre Tem | 0.274556             | 1  | 4.88E-07       | 0.274555   | 0.274557    |

ANOVA for Response Surface Reduced Linear Model

| Analysis of variance table [Partial sum of squares - Type III] |                |    |             |          |                      |
|----------------------------------------------------------------|----------------|----|-------------|----------|----------------------|
| Source                                                         | Sum of Squares | df | Mean Square | F Value  | p-value Prob > F     |
| Block                                                          | 0              | 2  | 0           |          |                      |
| Model                                                          | 0.7538101      | 1  | 0.75381     | 63660000 | < 0.0001 significant |
| B-Pre Tem                                                      | 0.7538101      | 1  | 0.75381     | 63660000 | < 0.0001             |
| Residual                                                       | 0              | 16 | 0           |          |                      |
| Lack of Fit                                                    | 0              | 13 | 0           |          |                      |
| Pure Error                                                     | 0              | 3  | 0           |          |                      |
| Cor Total                                                      | 0.7538101      | 19 |             |          |                      |

1.000 R<sup>2</sup>  
1.000 R<sup>2</sup> adj
